# Supplementary material
Source: MDPI journal article supplement (https://www.mdpi.com/2673-4605/6/1/33)
Supplement: s1 [file s1]

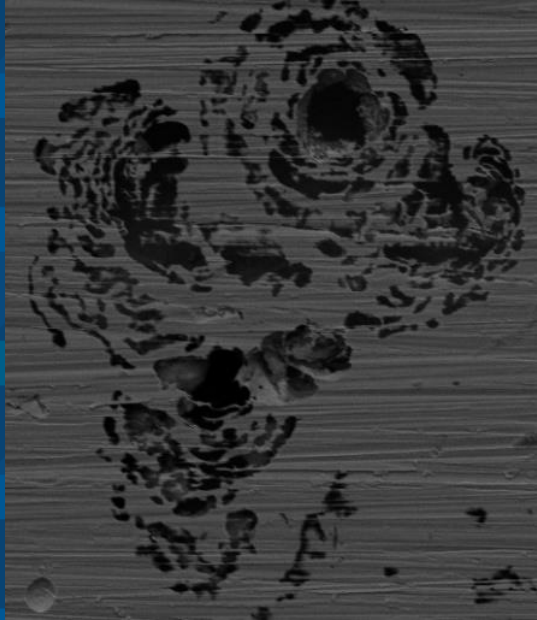

VTT

# Corrosivity of different natural groundwaters from repository sites

Mervi Somervuori, Elisa Isotahdon, Maija  
Nuppunen-Puputti, Malin Bomberg,  
Leena Carpen and Pauliina Rajala

03/05/2021 VTT – beyond the obvious

# Introduction

In Finland repositories of low and intermediate-level waste

- in deep bedrock
- near the nuclear power plants
- 60 to 100 m below the ground level

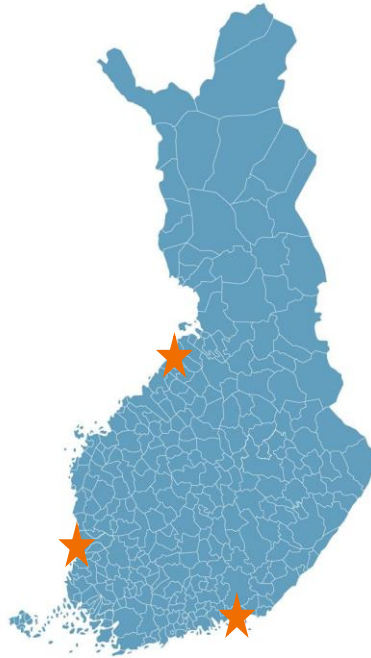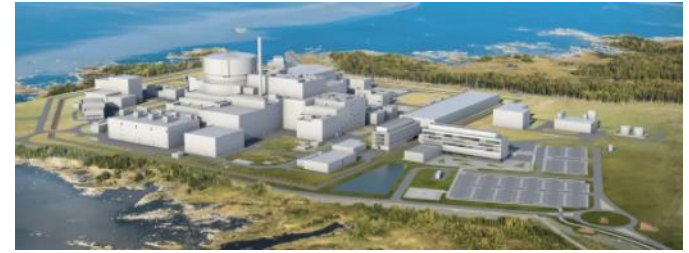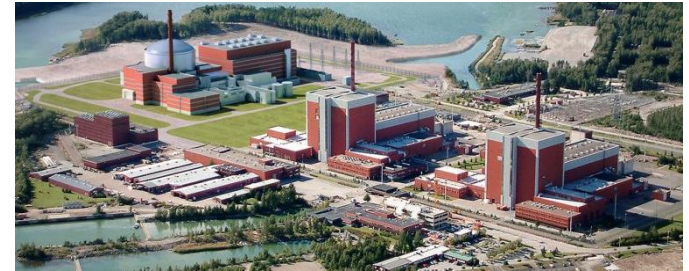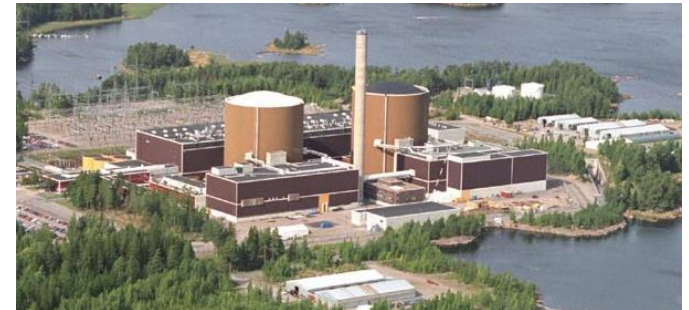

# Introduction

- Carbon steel containers
- Waste contains both carbon steel and stainless steel
- The containers and waste will be subjected to natural groundwater
- Groundwater always contains microorganisms
- Composition of the water depends on the origin
- Different forms of corrosion depending on the local environment

## Aim of this study

- To study corrosion properties in various water conditions corresponding to each repository site
- Water composition and microbiology of natural groundwater were determined
- Corrosion properties of one carbon steel and two stainless steels were studied by electrochemical measurements

# EXPERIMENTAL

# Experimental set up

- Three natural groundwaters and one simulated water was studied in anoxic conditions
- The simulated water was designed to mimic the water from location C
- Water composition was analysed and the pitting index calculated
- Microbial community sizes by quantitative PCR (qPCR)
- Electrochemical measurements to define
  - Corrosion potentials
  - Corrosion rates
  - Corrosion forms
- Characterisation of the steel specimens by SEM

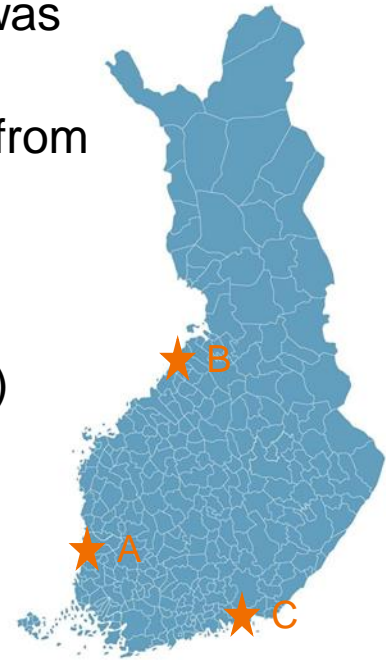

# Water Chemistry

- Corrosion is highly dependent on water chemistry
  - > the water chemistry has important role in steel corrosion
- Chlorides and sulphates are known to cause corrosion
- Main chemical components of each water were analysed
- Physical parameters were determined
  - pH, O<sub>2</sub>, redox, conductivity
- Corrosivity of the water for carbon steel can be evaluated by calculating a pitting index
  - Value exceeding 1 predict pitting and localised corrosion

# Microbiology

- Bacterial, archaeal and fungal communities were studied
- Community size by quantitative PCR (qPCR)
  - Bacterial and archaeal 16S rRNA, fungal 5.8S rRNA, sulphate reducing bacteria (*dsrB*)
- Community composition by amplicon library sequencing
  - Bacteria/archaea 16S rRNA, fungi ITS

# Steels used in the electrochemical measurements

- Cold-rolled low carbon steel AISI 1005 (UNS G10050)
- Two stainless steel similar to AISI 304 (UNS S30400) and AISI 316L (UNS S31603)

|            | C     | Si     | Mn   | P     | S     | Ni   | Cr   | Mo    | V     |
|------------|-------|--------|------|-------|-------|------|------|-------|-------|
| AISI 1005* | 0.025 | <0.005 | 0.19 | 0.007 | 0.007 | 0.02 | 0.03 | <0.01 | 0.002 |
| AISI 304   | 0.037 | 0.42   | 1.54 | 0.027 | 0.002 | 8.47 | 18.1 | 0.13  | 0.056 |
| AISI 316L  | 0.024 | 0.39   | 0.94 | 0.032 | 0.002 | 10.1 | 17.1 | 2.01  | 0.06  |

\* N 0.002 %

# Electrochemical measurements

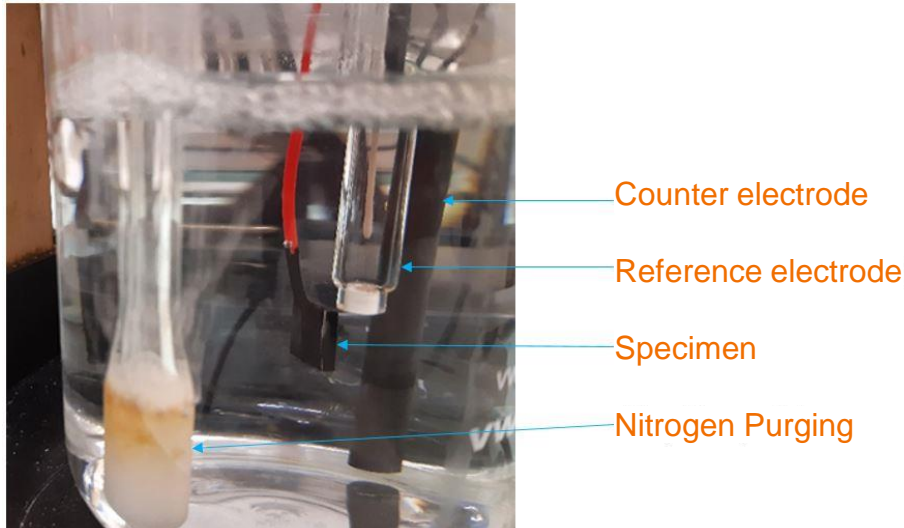

Anoxic environment at room temperature

**Open Circuit Potential** measurements

**Tafel curves** for carbon steel

- - 250 mV vs. OCP to +250 mV vs. OCP
- 10 mV/min

**Cyclic polarisation curves** for stainless steels

- From OCP to 5 mA/cm<sup>2</sup>, or to + 1000 mV vs. Ag-AgCl
- 18 mV/min

**Corrosion rates calculated** using Faraday's law

# RESULTS:

## Water composition and microbiology

# Chemical composition of the waters

| Element/ characteristic       | Unit   | Water A | Water B | Water C | Simulated water |
|-------------------------------|--------|---------|---------|---------|-----------------|
| pH                            |        | 8.73    | 7.33    | 7.74    | 7               |
| Alkalinity pH 4.5             | mmol/L | 3.15    | 5.41    | 1.82    |                 |
| CO <sub>2</sub> (total)       | mg/L   | 138     | 268     | 87      |                 |
| HCO <sub>3</sub> <sup>-</sup> | mg/L   | 192     | 330     | 111     |                 |
| Phosphate                     | mg/L   | <0.040  | 0.068   | <0.040  |                 |
| Sulphate                      | mg/L   | 116     | 482     | 566     | 500             |
| Sulphide                      | mg/L   | 0.147   | <0.050  | <0.010  |                 |
| Chloride                      | mg/L   | 723     | 3210    | 4880    | 5500            |
| Ammonium                      | mg/L   | 0.179   | 2.9     | 1.82    |                 |
| Ca (soluble)                  | mg/L   | 56.8    | 444     | 615     |                 |
| Mg (soluble)                  | mg/L   | 30.2    | 109     | 276     |                 |
| Na (soluble)                  | mg/L   | 489     | 1380    | 2210    |                 |
| S                             | mg/L   | 44.4    | 140     | 204     |                 |
| Si                            | mg/L   | 2.28    | 7.23    | 4.56    |                 |
| TOC                           | mg/L   | 6.37    | 10.3    | 1.33    |                 |
| Sulphate/chloride ratio       |        | 0.16    | 0.15    | 0.12    | 0.09            |
|                               |        | Water A | Water B | Water C |                 |
| Pitting index                 |        | 7.25    | 18.60   | 82.14   |                 |

# Number of microorganisms in the waters

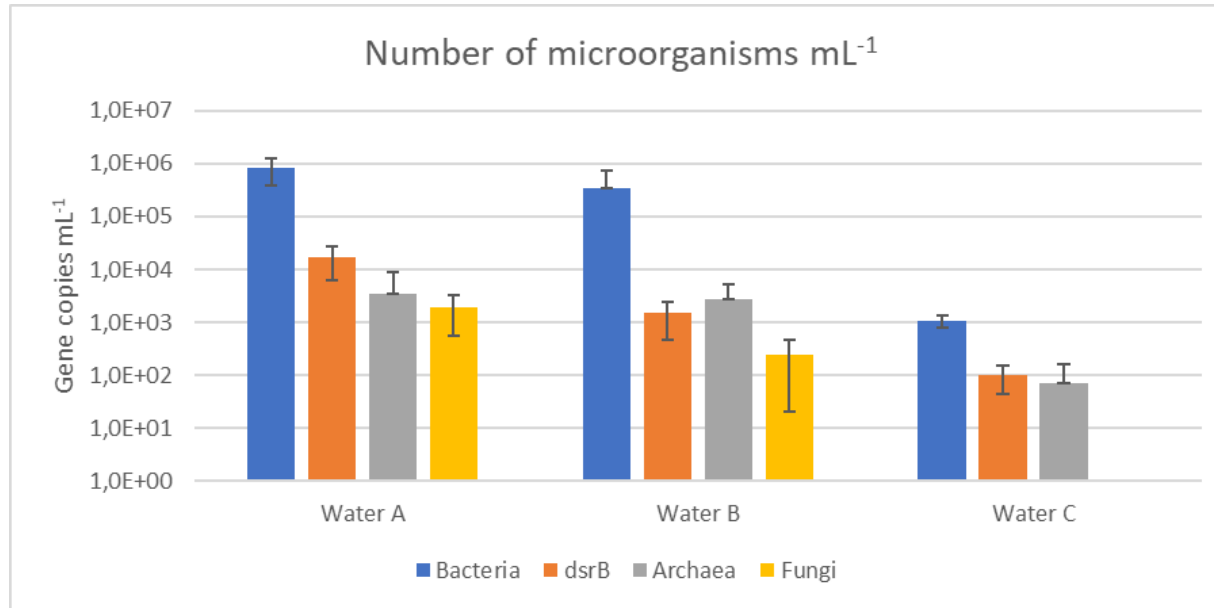

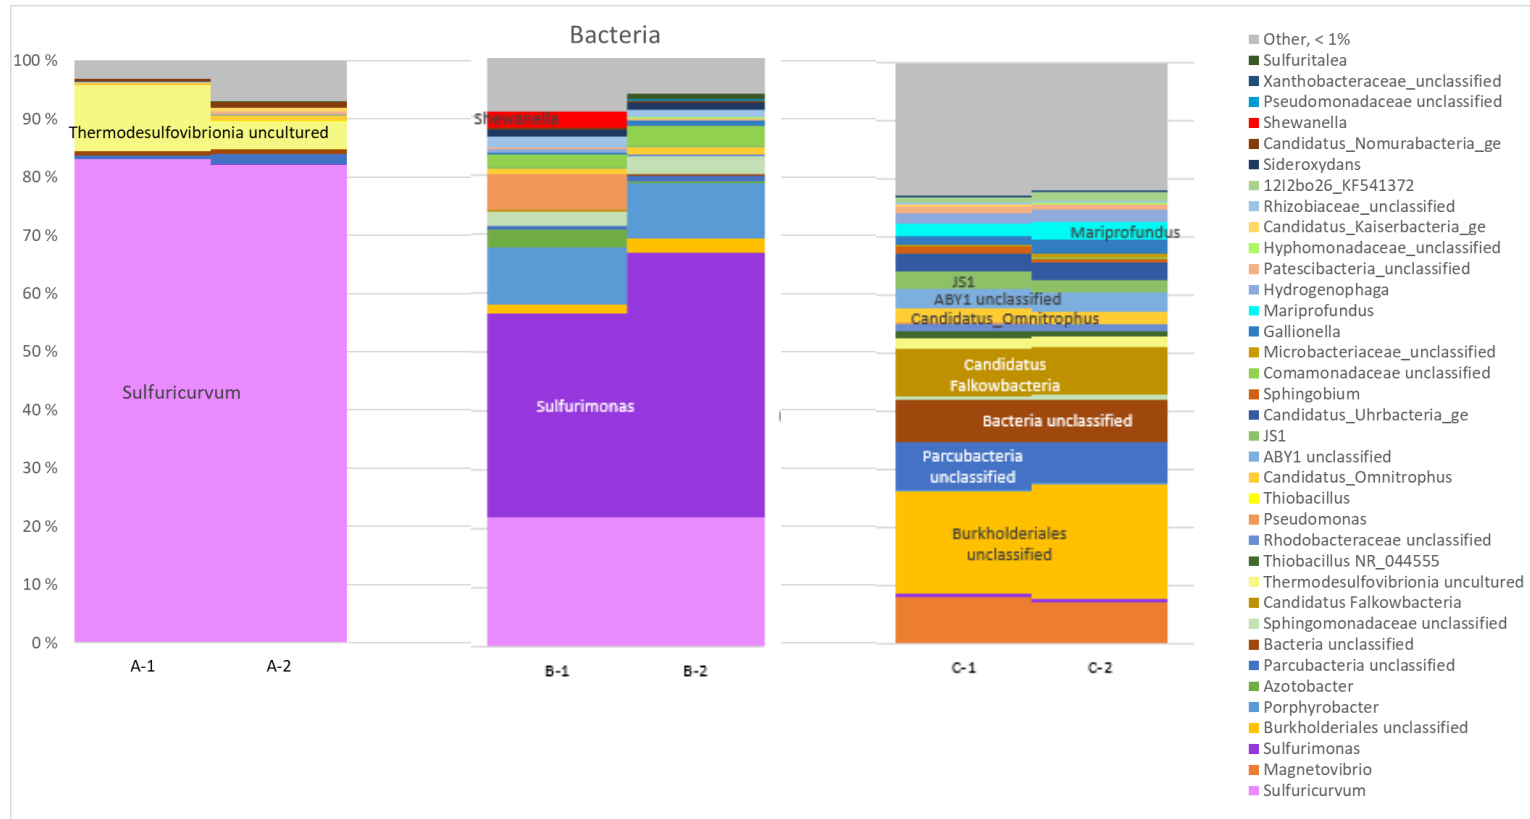

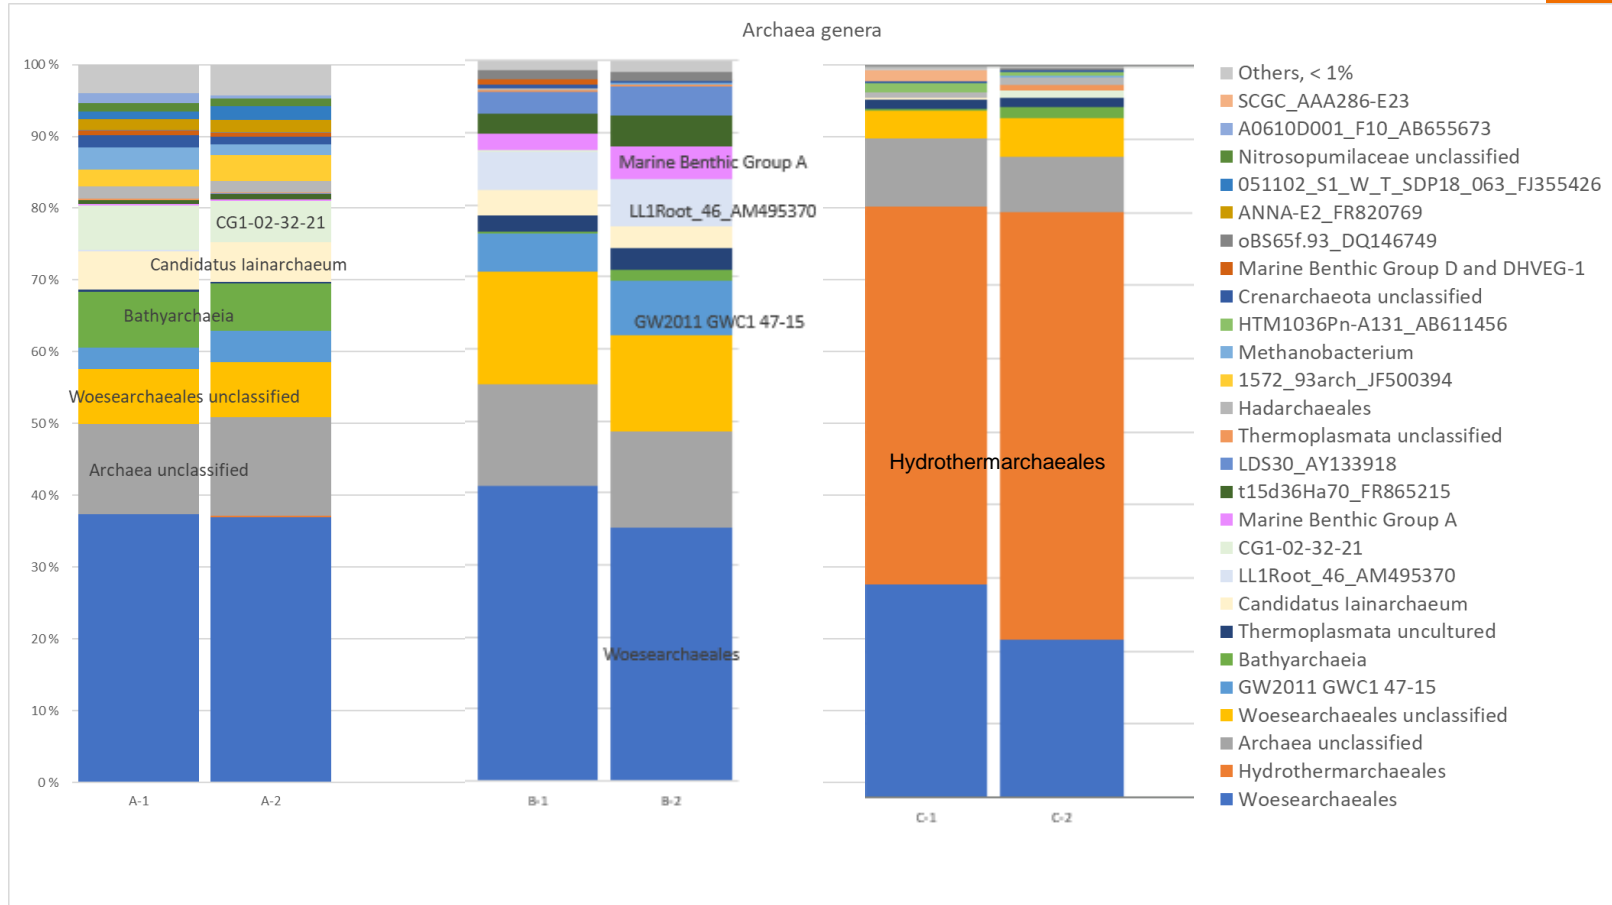

# RESULTS:

## Steel corrosion

# Carbon steel

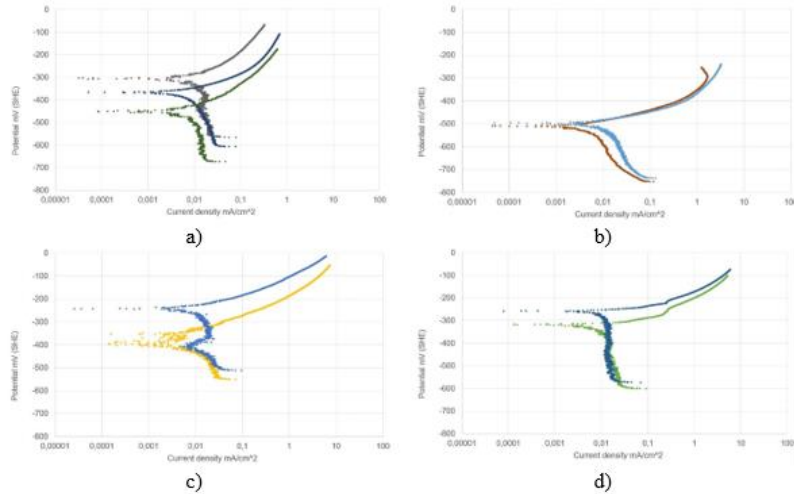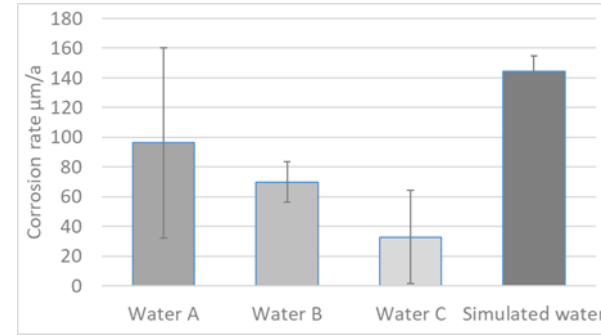

The average corrosion rates

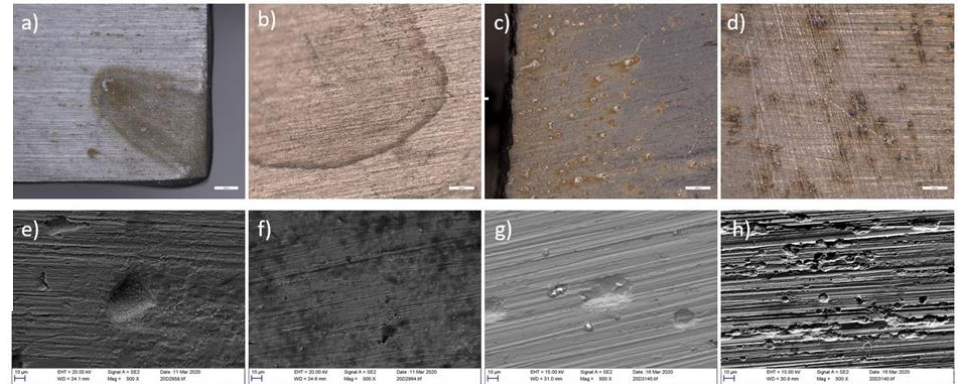

Water A

Water B

Water C

simulated water

# Stainless steel AISI 304

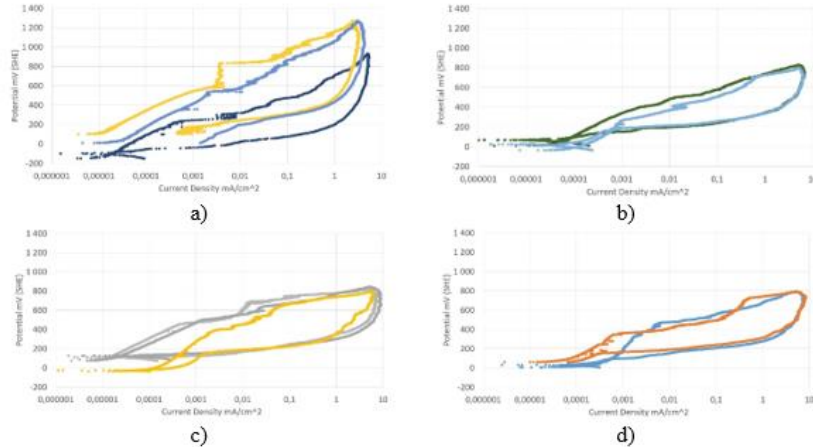

a) water A, b) water B, c) water C and d) simulated water

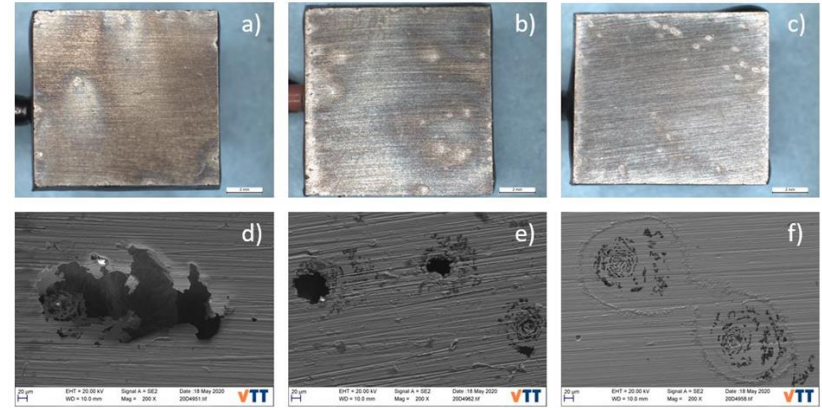

Water A

Water B

Water C

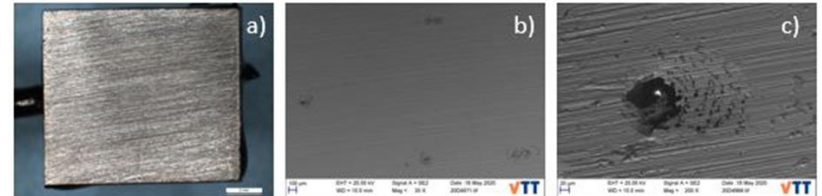

Simulated water

# Stainless steel AISI 316L

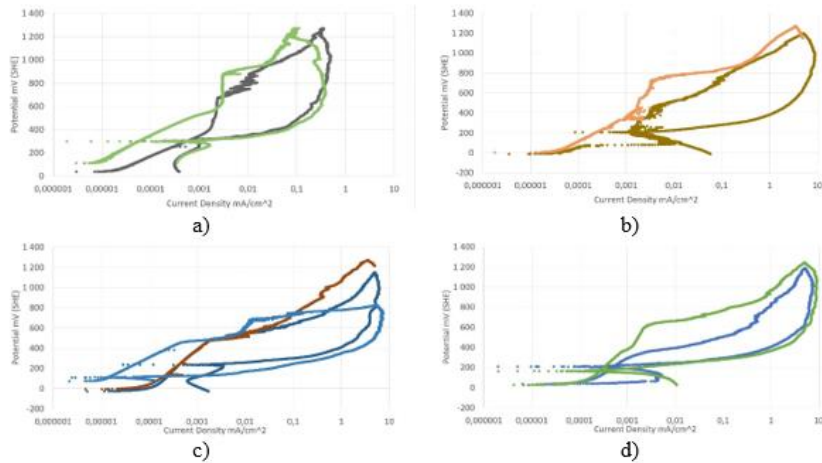

a) water A, b) water B, c) water C and  
d) simulated water

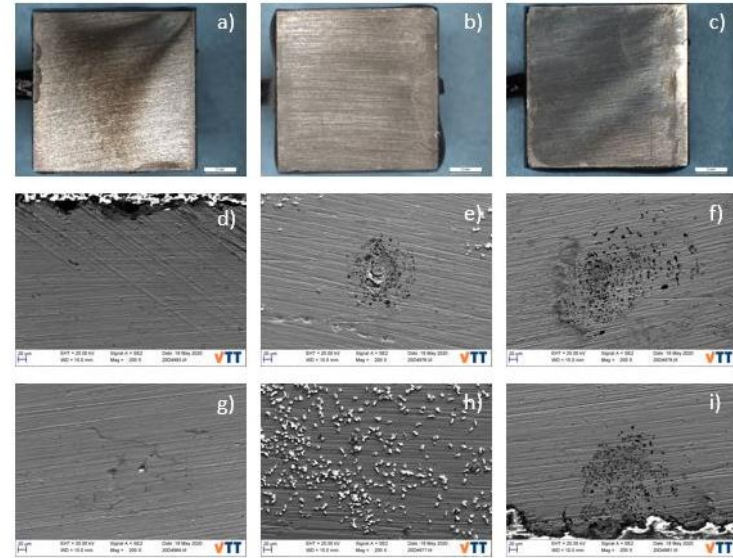

Water A

Water B

Water C

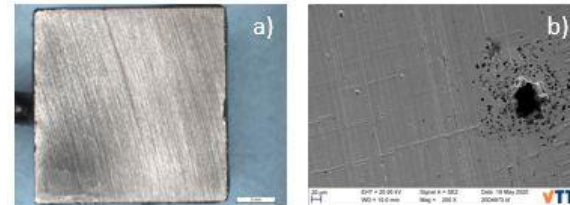

Simulated water

# Conclusions

# Conclusions

- the groundwater differed remarkably in their chemical composition as well as abundance and diversity of microbial community
- corrosivity of the natural water and thus the steels' performance in the water can vary a lot depending on the origin of the water
- besides stainless steel also carbon steel suffered from pitting and other localised corrosion, as predicted by pitting index
- the local groundwater conditions have to be taken into account when predicting the durability and expected life repositioning LLW and ILW steel canisters to guarantee the long-term safety of disposal of nuclear waste

# Acknowledgements

VTT Technical Research  
Centre of Finland Ltd.

KYT2022 Finnish  
Research Programme  
on Nuclear Waste  
Management 2019-  
2022, Project TERKOR

The Finnish power plant  
operators

Laboratory staff and  
colleagues
